# Supplementary material
Source: publisher figshare collection journal article supplement (https://acs.figshare.com/ndownloader/files/4018669)
Supplement: Supplementary file 1 [file 4018669]

## Supporting Information

### Cationic and Thiol-Ene Photopolymerization Upon Red Lights Using Anthraquinone Derivatives as Photoinitiators.

Pu Xiao,<sup>a</sup> Frédéric Dumur,<sup>b</sup> Bernadette Graff,<sup>a</sup> Jean Pierre Fouassier,<sup>c</sup> Didier Gigmes,<sup>\*,b</sup> and  
Jacques Lalevée<sup>\*,a</sup>

<sup>a</sup>Institut de Science des Matériaux de Mulhouse IS2M, UMR CNRS 7361, ENSCMu-UHA, 15,  
rue Jean Starcky, 68057 Mulhouse Cedex, France.

<sup>b</sup>Aix-Marseille Université, CNRS, Institut de Chimie Radicalaire, UMR 7273, F-13397  
Marseille, France.

<sup>c</sup>Formerly, ENSCMu-UHA, 3 rue Alfred Werner, 68093 Mulhouse Cedex, France.

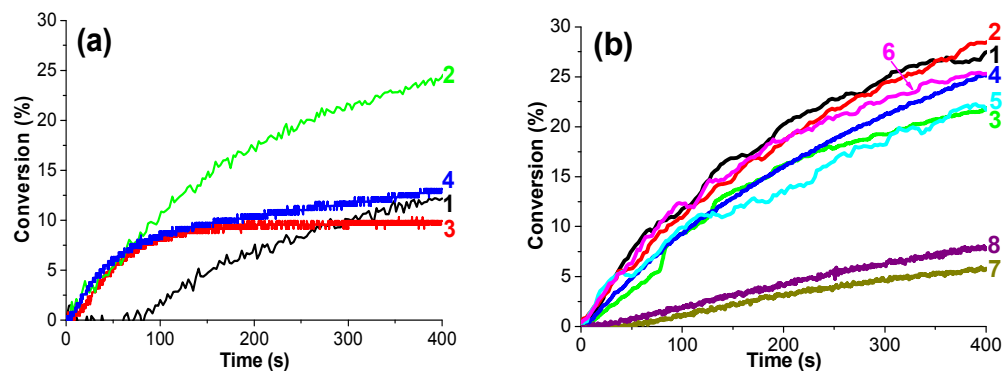

**Figure S1.** Photopolymerization profile of TMPTA in laminate (a) in the presence of OBN/Iod (0.5%/2%, w/w) (curves 1 and 3) or OBN/Iod/NVK (0.5%/2%/3%, w/w/w) (curves 2 and 4) upon the halogen lamp (curves 1 and 2) or the laser diode at 635 nm exposure (curves 3 and 4); (b) in the presence of OBN/MDEA (0.5%/2%, w/w) (curves 1 and 3), OBN/MDEA/R-Br (0.5%/2%/3%, w/w/w) (curves 2 and 4), OBN (2%, w) (curve 5 and 7) or OBN/R-Br (2%/3%, w/w) (curves 6 and 8) upon the halogen lamp (curves 1, 2, 5 and 6) or the laser diode at 635 nm exposure (curves 3, 4, 7 and 8).

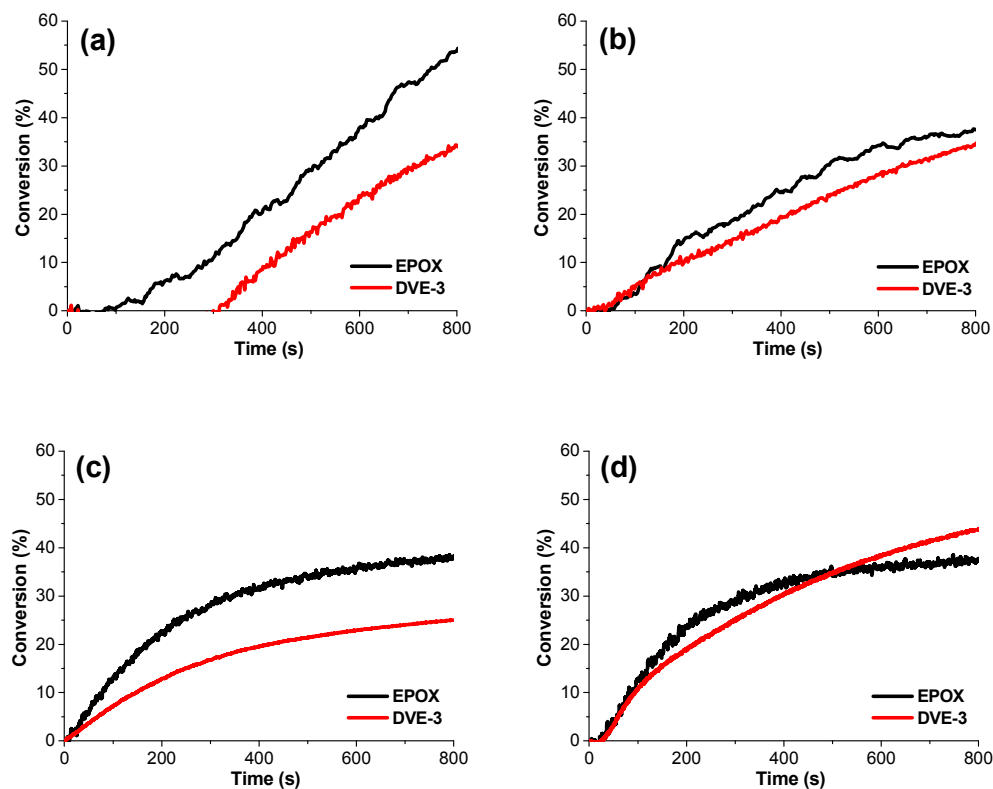

**Figure S2.** Photopolymerization profile of an EPOX/DVE-3 blend (50%/50%, w/w) in the presence of OBN/Iod/NVK (0.5%/2%/3%, w/w/w) under air (a, c) and in laminate (b, d); halogen lamp exposure (a, b); laser diode exposure at 635 nm (c, d).

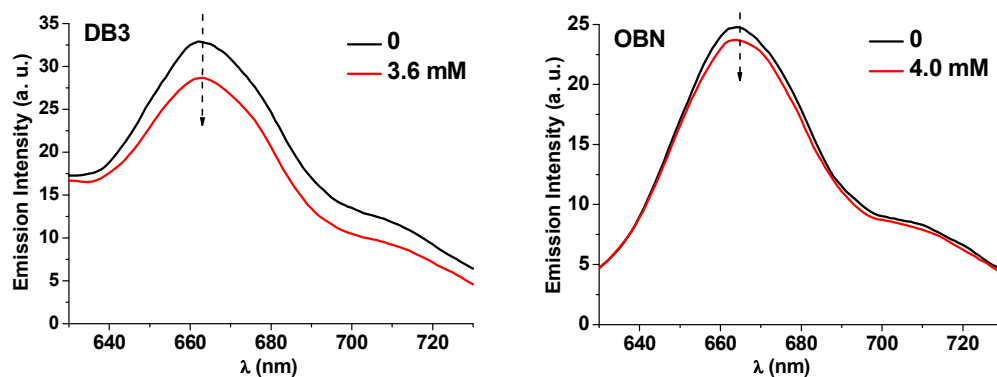

**Figure S3.** Typical fluorescence spectra for the quenching of DB3 and OBN by Iod in acetonitrile.

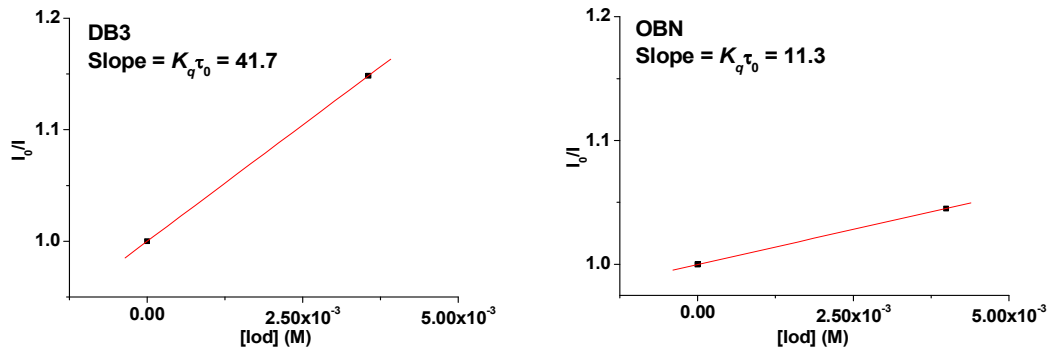

**Figure S4.** Examples of fluorescence quenching of DB3 or OBN by Iod in acetonitrile (fluorescence lifetime determined from time-resolved fluorescence experiments).

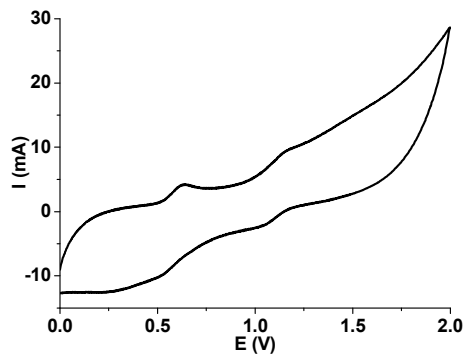

**Figure S5.** Cyclic voltammogram of OBN (measured in acetonitrile with tetrabutylammonium hexafluorophosphate as a supporting electrolyte).

**Table S1.** EPOX and DVE-3 final conversions obtained from the photopolymerization of an EPOX/DVE-3 blend (50%/50%, w/w) under air or in laminate upon exposure to the halogen lamp or the laser diode at 635 nm for 800 s in the presence of OBN/Iod/NVK (0.5%/2%/3%, w/w/w).

|                       | EPOX conversion (%) |             | DVE-3 conversion (%) |             |
|-----------------------|---------------------|-------------|----------------------|-------------|
|                       | Under air           | In laminate | Under air            | In laminate |
| Halogen lamp          | 54%                 | 37%         | 34%                  | 35%         |
| Laser diode at 635 nm | 38%                 | 37%         | 25%                  | 44%         |
